# Supplementary material for: N-Doped carbon nanospheres with nanocavities to encapsulate manganese oxides as ORR electrocatalysts
Source: Royal Society of Chemistry journal article supplement (doi:10.1039/d0nj03056b), 2020-01-01
Supplement: d0nj03056b1.pdf [file d0nj03056b1.pdf]

*New Journal of Chemistry*

**N-doped carbon nanospheres with nanocavities to encapsulate manganese oxides toward ORR electrocatalysts**

Mingui Wang,<sup>a,b</sup> Fang Peng,<sup>a</sup> Min Wang,<sup>a</sup> Jie Han<sup>\*b</sup>

<sup>a</sup> Guangling College, Yangzhou University, Yangzhou, Jiangsu 225009, P. R. China

<sup>b</sup> School of Chemistry and Chemical Engineering, Yangzhou University, Yangzhou, Jiangsu 225002, P. R. China

## List of supplementary material

**SI-1** Details for electrochemical test.

**Fig. S1** (a) Raman spectra and (b) XPS survey spectrum of N-CN@MnO<sub>2</sub> hybrids, XPS spectra of (c) C 1s, (d) N 1s and (e) Mn 2p of N-CN@MnO<sub>2</sub> hybrids, (f) XRD pattern of N-CN@MnO<sub>2</sub> hybrids.

**Fig. S2** XPS spectra of (a) C 1s and (b) N 1s for N-CN@Mn<sub>3</sub>O<sub>4</sub>, (c) C 1s and (d) N 1s for N-CN@MnO.

**Fig. S3** Relative ratios of various nitrogen types in N-CN@MnO<sub>2</sub>, N-CN@Mn<sub>3</sub>O<sub>4</sub> and N-CN@MnO hybrids.

**Fig. S4** Cycle voltammetry curves of (a) N-CNs, (b) N-CN@MnO<sub>2</sub>, (c) N-CN@Mn<sub>3</sub>O<sub>4</sub>, (d) N-CN@MnO hybrids and (e) Pt/C in N<sub>2</sub>- and O<sub>2</sub>-saturated 0.1 M KOH with a scan rate of 20 mV s<sup>-1</sup>.

**Fig. S5** LSV curves of (a) N-CNs, (b) N-CN@MnO<sub>2</sub>, (c) N-CN@MnO hybrids and (d) Pt/C in O<sub>2</sub>-saturated 0.1 M KOH with various rotating speeds.

**Fig. S6** (a) The differential plots of *I* versus *E* constructed from the LSV curve. (b) K-L plots of N-CN@Mn<sub>3</sub>O<sub>4</sub> at 0.3-0.5 V. (c) Peroxide yield (solid line) and the electron transfer number (dotted line) of different catalysts at different potentials.

**Fig. S7** SEM images of N-CN@Mn<sub>3</sub>O<sub>4</sub> hybrids (a) before and (b) after long-term stability testing, (c) XRD patterns of N-CN@Mn<sub>3</sub>O<sub>4</sub> before and after catalytic reaction.

**Table S1** BET surface area and BJH pore size and volume of N-CN@MnO<sub>2</sub>, N-CN@Mn<sub>3</sub>O<sub>4</sub> and N-CN@MnO hybrids.

**Table S2** Comparison of the electrochemical performances of N-CN@Mn<sub>3</sub>O<sub>4</sub> sample involved in ORR with reported results. References

## Electrochemical test

Electrochemical measurements including cyclic voltammetry (CV), linear scan voltammogram (LSV) and stability were performed on an electrochemical workstation (VMP3, Biologic, France) equipped with a three-electrode cell system. A rotating ring-disk electrode (RRDE) of 5.61 mm in disk diameter loaded with electrocatalyst was used as the working electrode with Ag/AgCl electrode as the reference electrode, and Pt wire as the counter electrode. The oxygen reduction reaction was carried out in an O<sub>2</sub> saturated 0.1 M KOH aqueous solution. The stability test was collected at 0.8 V vs. Ag/AgCl with a rotation speed of 400 rpm.

The working electrode was prepared as follows: 10.0 mg of catalyst were dispersed in solvent mixture of 5 wt % Nafion solution (0.05 mL) and 2-propanol (0.95 mL) under sonication for 1 h to form a homogeneous ink. Then 7 μL of the resulting suspension was dropped onto a pre-polished rotating disk electrode (RRDE, S<sub>disk</sub> = 0.2475 cm<sup>2</sup>) and dried at room temperature. For comparison, commercial Pt/C-20% electrocatalyst (Sigma-Aldrich) was used.

The number of electrons transferred onto the as-prepared catalyst was calculated according to the Koutecky-Levich equation:

$$\frac{1}{J} = \frac{1}{J_L} + \frac{1}{J_K} = \frac{1}{B\omega^{1/2}} + \frac{1}{J_K} \quad (1)$$

Where  $J$  is the measured current,  $J_K$  is the kinetic current,  $\omega$  is the electro rotating rate.  $B$  is determined from the slope of the Koutecky-Levich (K-L) plots according to the Levich equation as given below:

$$B = 0.62nFC_0(D_0)^{2/3}\nu^{-1/6} \quad (2)$$

where  $n$  represents the overall number of electrons transferred in oxygen reduction,  $F$  is the Faraday constant (96485 C mol<sup>-1</sup>),  $C_0$  is the bulk concentration of O<sub>2</sub> (1.2 × 10<sup>-6</sup> mol cm<sup>-3</sup>),  $D_0$  is the diffusion coefficient of O<sub>2</sub> in 0.1 mol L<sup>-1</sup> KOH electrolyte (1.9 × 10<sup>-5</sup> cm<sup>2</sup> s<sup>-1</sup>),  $\nu$  is the kinematic viscosity of the electrolyte (0.01 cm<sup>2</sup> s<sup>-1</sup>).

The H<sub>2</sub>O<sub>2</sub> yield and electron transfer number were calculated from the following

equation:

$$\text{H}_2\text{O}_2 (\%) = 200I_r / (NI_d + I_r) \quad (3)$$

$$n = 4I_d / (I_d + I_r / N) \quad (4)$$

where  $I_d$  and  $I_r$  are the disk and ring currents, respectively, and  $N$  is the current collection efficiency of RRDE.  $N$  was determined to be 0.37.

For the Tafel plot, the kinetic current was calculated from the mass-transport correction of RDE by:

$$J_K = \frac{J^* J_L}{J_L - J} \quad (5)$$

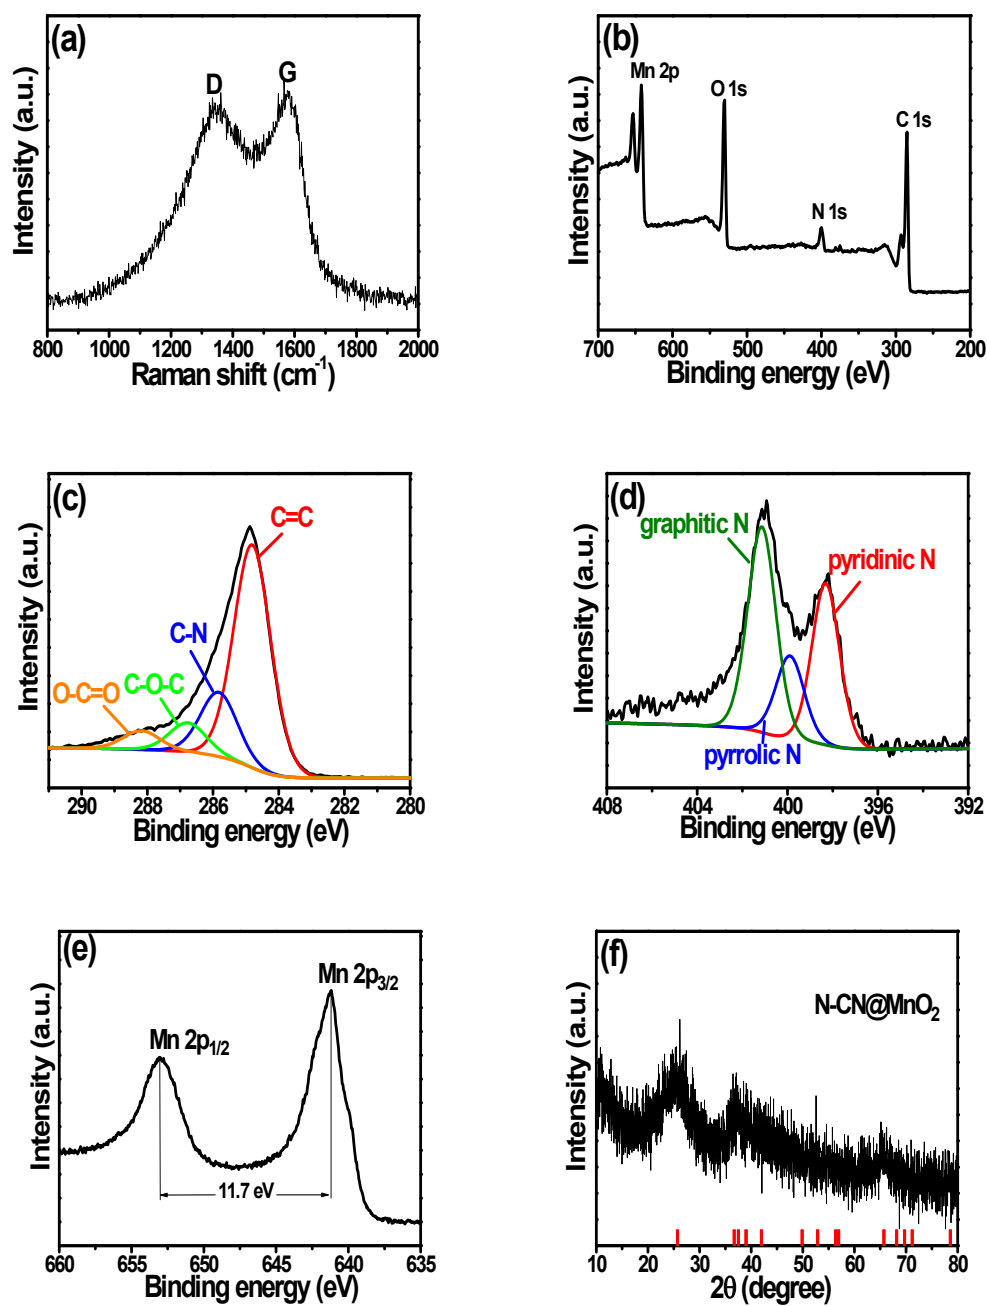

**Fig. S1** (a) Raman spectra and (b) XPS survey spectrum of N-CN@MnO<sub>2</sub> hybrids, XPS spectra of (c) C 1s, (d) N 1s and (e) Mn 2p of N-CN@MnO<sub>2</sub> hybrids, (f) XRD pattern of N-CN@MnO<sub>2</sub> hybrids.

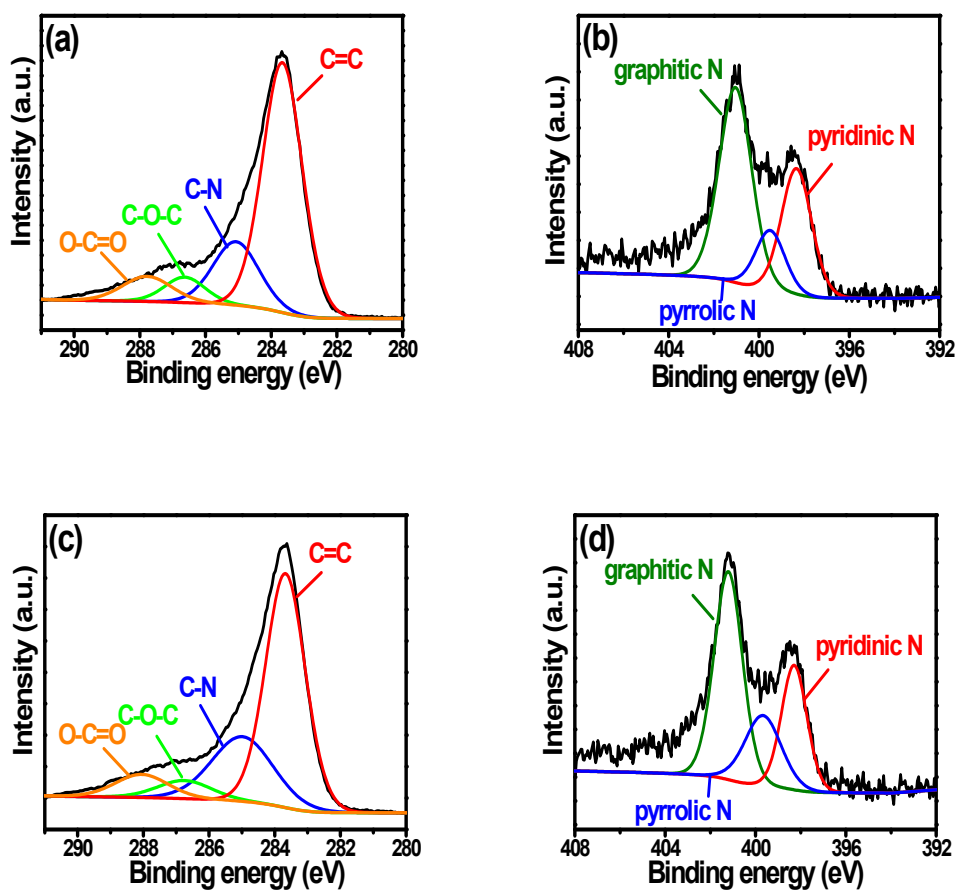

**Fig. S2** XPS spectra of (a) C 1s and (b) N 1s for N-CN@Mn<sub>3</sub>O<sub>4</sub>, (c) C 1s and (d) N 1s for N-CN@MnO.

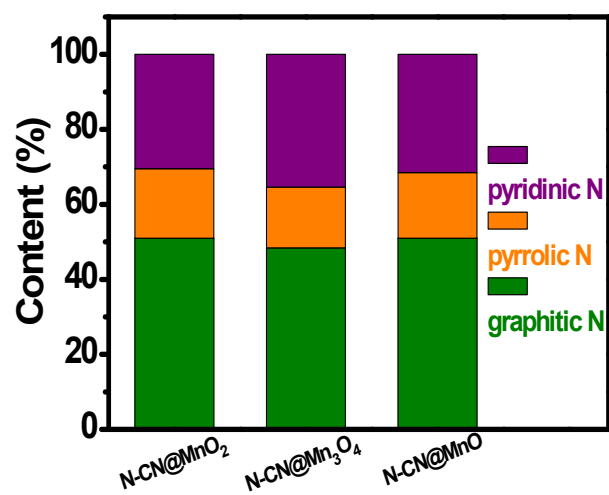

**Fig. S3** Relative ratios of various nitrogen types in N-CN@MnO<sub>2</sub>, N-CN@Mn<sub>3</sub>O<sub>4</sub> and N-CN@MnO hybrids.

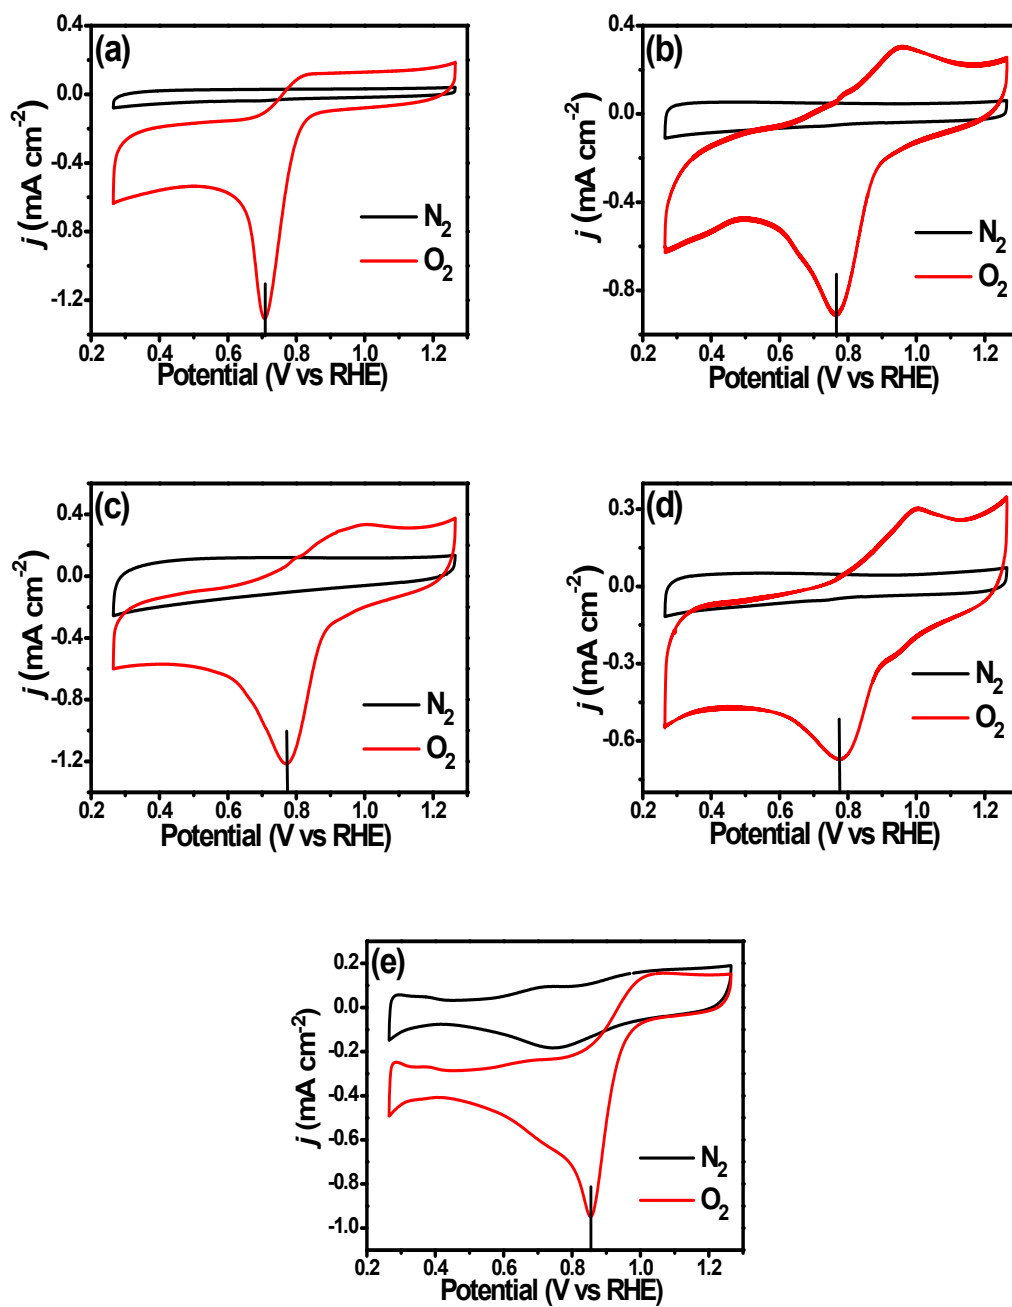

**Fig. S4** Cycle voltammetry curves of (a) N-CNs, (b) N-CN@MnO<sub>2</sub>, (c) N-CN@Mn<sub>3</sub>O<sub>4</sub>, (d) N-CN@MnO hybrids and (e) Pt/C in N<sub>2</sub>- and O<sub>2</sub>-saturated 0.1 M KOH with a scan rate of 20 mV s<sup>-1</sup>.



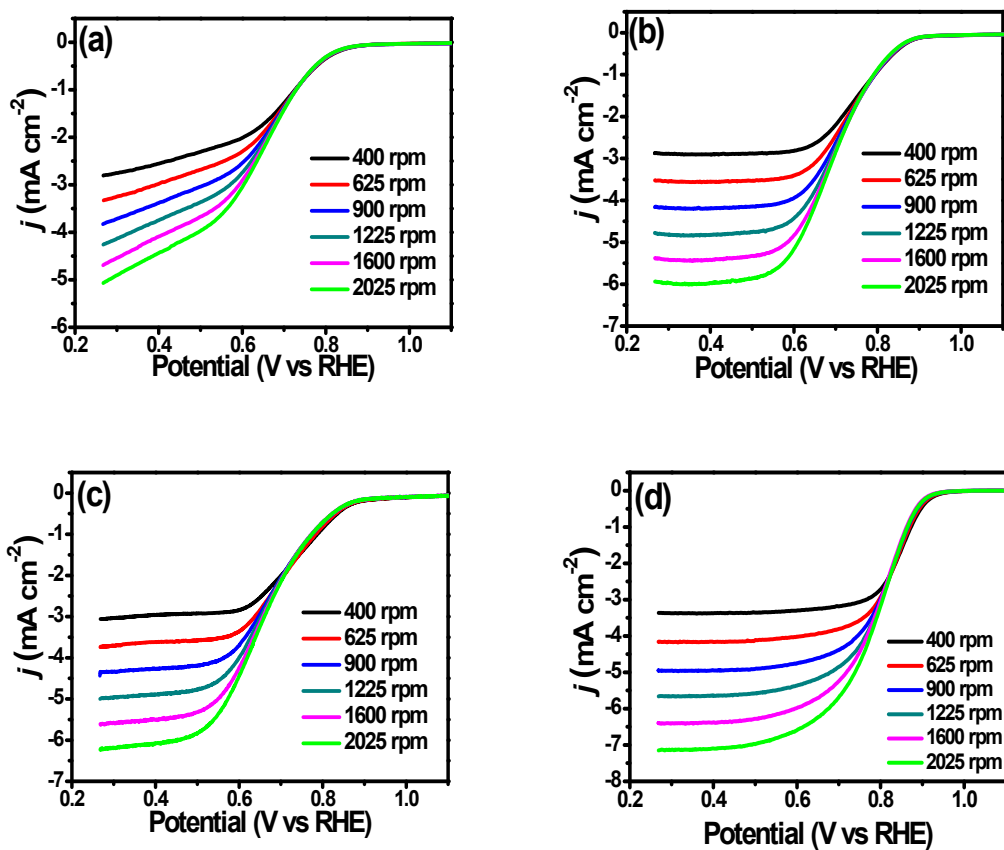

**Fig. S5** LSV curves of (a) N-CNs, (b) N-CN@MnO<sub>2</sub>, (c) N-CN@MnO hybrids and (d) Pt/C in O<sub>2</sub>-saturated 0.1 M KOH with various rotating speeds.

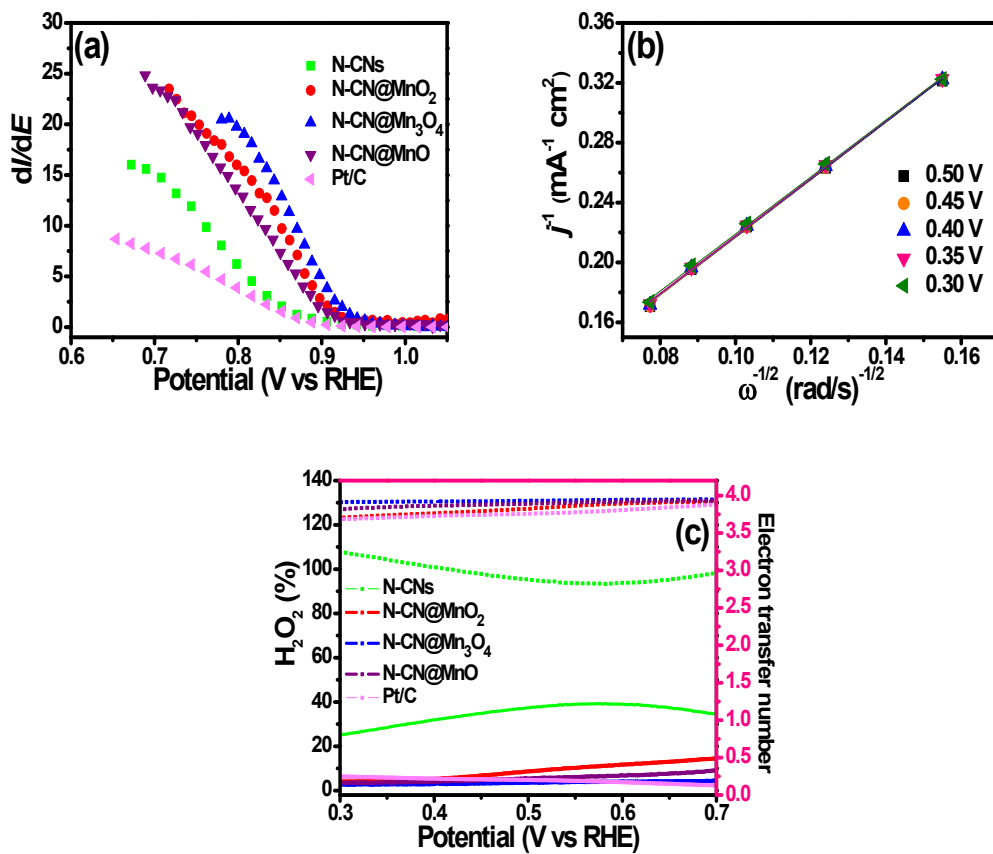

**Fig. S6** (a) The differential plots of  $I$  versus  $E$  constructed from the LSV curve. (b) K-L plots of N-CN@Mn<sub>3</sub>O<sub>4</sub> at 0.3-0.5 V. (c) Peroxide yield (solid line) and the electron transfer number (dotted line) of different catalysts at different potentials.

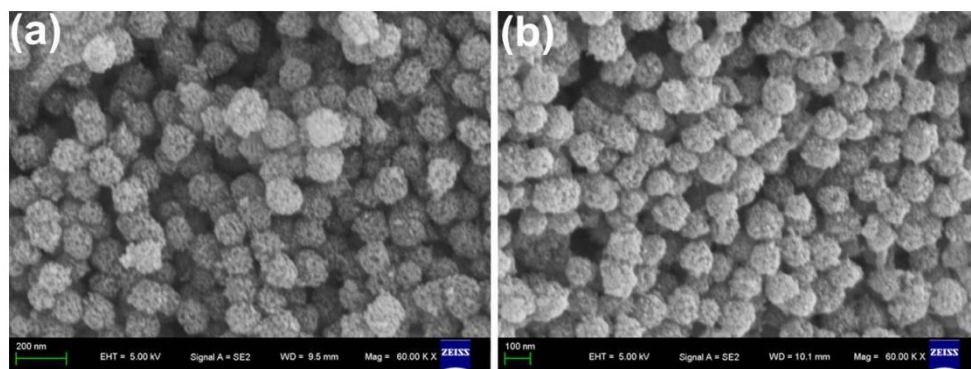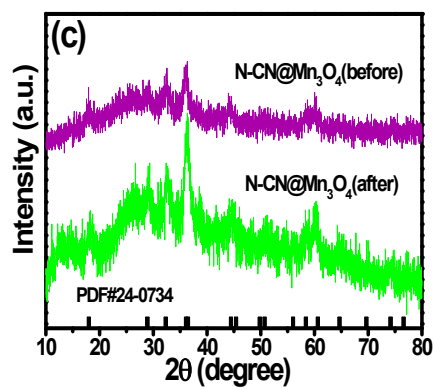

**Fig. S7** SEM images of N-CN@Mn<sub>3</sub>O<sub>4</sub> hybrids (a) before and (b) after long-term stability testing, (c) XRD patterns of N-CN@Mn<sub>3</sub>O<sub>4</sub> before and after catalytic reaction.

**Table S1** BET surface area and BJH pore size and volume of N-CN@MnO<sub>2</sub>, N-CN@Mn<sub>3</sub>O<sub>4</sub> and N-CN@MnO hybrids.

| Catalyst                            | SSA (m <sup>2</sup> g <sup>-1</sup> ) | TPV (cm <sup>3</sup> g <sup>-1</sup> ) | Pore size (nm) |
|-------------------------------------|---------------------------------------|----------------------------------------|----------------|
| N-CN@MnO <sub>2</sub>               | 244.1                                 | 0.5348                                 | 3.69           |
| N-CN@Mn <sub>3</sub> O <sub>4</sub> | 293.5                                 | 0.7451                                 | 3.71           |
| N-CN@MnO                            | 216.8                                 | 0.4546                                 | 10.6           |

**Table S2** Comparison of the electrochemical performances of N-CN@Mn<sub>3</sub>O<sub>4</sub> sample involved in ORR with reported results.

| Catalyst                                                             | $E_{\text{onset}}$ (V) | $I_s$ (mA cm <sup>-2</sup> ) | $n$  | Reference |
|----------------------------------------------------------------------|------------------------|------------------------------|------|-----------|
| Mn <sub>3</sub> O <sub>4</sub> @GF_O <sub>3</sub>                    | 0.82                   | -2.8                         | 3.8  | 1         |
| Mn <sub>3</sub> O <sub>4</sub> /NCP                                  | 0.92                   | -5.24                        | 3.91 | 2         |
| graphene@Mn <sub>3</sub> O <sub>4</sub>                              | 0.89                   | -5.85                        | 3.91 | 3         |
| Mn <sub>3</sub> O <sub>4</sub> /rGO                                  | -                      | -4.37                        | 3.81 | 4         |
| Mn <sub>3</sub> O <sub>4</sub> /MXene                                | 0.89                   | -3.15                        | 3.4  | 5         |
| g-                                                                   |                        |                              |      |           |
| C <sub>3</sub> N <sub>4</sub> @MWCNTs/Mn <sub>3</sub> O <sub>4</sub> | 0.821                  | -4.47                        | 3.80 | 6         |
| N-CN@Mn <sub>3</sub> O <sub>4</sub>                                  | 0.906                  | -5.85                        | 3.93 | this work |

## References

1. M. P. Araújo, M. Nunes, I. M. Rocha, M. F. R. Pereira and C. Freire, *J. Mater. Sci.*, 2019, **54**, 8919-8940.
2. T. Najam, X. K. Cai, M. K. Aslam, M. K. Tufail and S. S. A. Shah, *Int. J. Hydrogen Energ.*, 2020, **45**, 12903-12910.
3. T. Wang, Q. J. Le, X. L. Guo, M. Huang, X. Y. Liu, F. Dong, J. T. Zhang and Y. X. Zhang, *ACS Sustainable Chem. Eng.*, 2019, **7**, 831-837.
4. Y. Zhang, X. F. Zhang, M. R. Liu, Y. Q. Liu, H. D. Huang and S. Lin, *J. Solid State Electrochem.*, 2018, **22**, 2159-2168.
5. Q. Xue, Z. X. Pei, Y. Huang, M. S. Zhu, Z. J. Tang, H. F. Li, Y. Huang, N. Li, H. Y. Zhang and C. Y. Zhi, *J. Mater. Chem. A*, 2017, **5**, 20818-20823.
6. G. H. Li, T. Sun, Y. Fu, L. X. Lei and O. Zhuo, *J. Solid State Electrochem.*, 2016, **20**, 2685-2692.
